# Supplementary material for: Characterization of a portable method for the collection of exhaled breath condensate and subsequent analysis of metal content
Source: Royal Society of Chemistry journal article supplement (doi:10.1039/c3em30906a), 2013-01-01
Supplement: c3em30906a.pdf [file c3em30906a.pdf]

## Supplemental Section

Table S1. Background metal concentration ( $\mu\text{g/L}$ ) of R tubes condensing tubes cleaned with different methods.

| Solution                   | Soln Purity | Soak Time | R tubes | N  | Mn   |        | Cr    |         | Ni   |        | Cd     |         |
|----------------------------|-------------|-----------|---------|----|------|--------|-------|---------|------|--------|--------|---------|
|                            |             |           |         |    | Mean | SD     | Avg   | SD      | Avg  | SD     | Avg    | SD      |
| 10% $\text{HN O}_3$        | Optima      | 18 hr     | New     | 5  | 0.95 | (0.39) | --    | --      | --   | --     | --     | --      |
| 10% $\text{HN O}_3$        | Optima      | 18 hr     | Used    | 4  | 0.76 | (0.37) | --    | --      | --   | --     | --     | --      |
| 10% $\text{HNO}_3$         | ACS         | 18 hr     | New     | 5  | 0.50 | (0.18) | --    | --      | --   | --     | --     | --      |
| 10% $\text{HNO}_3$         | ACS         | 5 day     | New     | 5  | 1.04 | (0.46) | 0.266 | (0.051) | 4.43 | (7.10) | 0.053  | (0.047) |
| 10% $\text{NH}_3\text{OH}$ | Optima      | 5 day     | New     | 4  | 0.30 | (0.10) | 0.030 | (0.014) | 0.17 | (0.13) | -0.132 | (0.002) |
| 10% $\text{NH}_3\text{OH}$ | ACS         | 5 day     | New     | 10 | 0.21 | (0.17) | 0.225 | (0.259) | 0.74 | (1.24) | -0.012 | (0.170) |

Table S2. Association between EBC metal concentration measured as  $\mu\text{g/L}$  EBC vs.  $\text{ng/L}$  air respired.

| Metal | Coefficient <sup>a</sup> | 95% CI       | p-value |
|-------|--------------------------|--------------|---------|
| Mn    | 18.8                     | [17.9, 19.7] | <0.001  |
| Cr    | 19.9                     | [19.3, 20.6] | <0.001  |
| Ni    | 21.3                     | [20.3, 22.4] | <0.001  |
| Cd    | 20.0                     | [18.4, 21.7] | <0.001  |

<sup>a</sup> [avg metal concentration ( $\mu\text{g/L}$ )] / [avg metal concentration ( $\text{ng/L}$  air respired)]

Table S3. Measurement sensitivity using 3 different ways of estimating the value.

| Metal | MDL  | IDL1  | IDL2  |
|-------|------|-------|-------|
| Mn    | 0.47 | 0.033 | 0.072 |
| Cr    | 0.12 | 0.028 | 0.070 |
| Ni    | 0.54 | 0.076 | 0.140 |
| Cd    | 0.28 | 0.085 | 0.008 |
